# Supplementary material for: Reconsidering the prognostic significance of tumour deposit count in the TNM staging system for colorectal cancer
Source: PubMed Central journal article supplement (PMC6952424; doi:10.1038/s41598-019-57041-2), 2020-01-09
Supplement: 41598_2019_57041_MOESM1_ESM.pdf [file 41598_2019_57041_MOESM1_ESM.pdf]

# **Reconsidering the prognostic significance of tumour deposit count in the TNM staging system for colorectal cancer**

Song Wang<sup>1\*</sup>, Xu Guan<sup>2\*</sup>, Mingfei Ma<sup>3</sup>, Meng Zhuang<sup>2</sup>, Tianyi Ma<sup>1</sup>, Zheng Liu<sup>2</sup>,  
Haipeng Chen<sup>2</sup>, Zheng Jiang<sup>2</sup>, Yinggang Chen<sup>1</sup>, Guiyu Wang<sup>1</sup>, Xishan Wang<sup>1,2</sup>

<sup>1</sup>Department of Colorectal Surgery, the Second Affiliated Hospital of Harbin Medical University, Harbin, Heilongjiang 150081, China. <sup>2</sup>Department of Colorectal Surgery, Cancer Hospital, Chinese Academy of Medical Sciences and Peking Union Medical College, Beijing 100021, China. <sup>3</sup>Medical Department, Heilongjiang University of Chinese Medicine, Harbin, Heilongjiang 150040, China. \*These authors contributed equally to this manuscript. Correspondence and requests for materials should be addressed to X.W. (Email: wxshan1208@126.com), G.W. (Email: guiyuwang@163.com) or H.C. (Email: 214787653@qq.com)

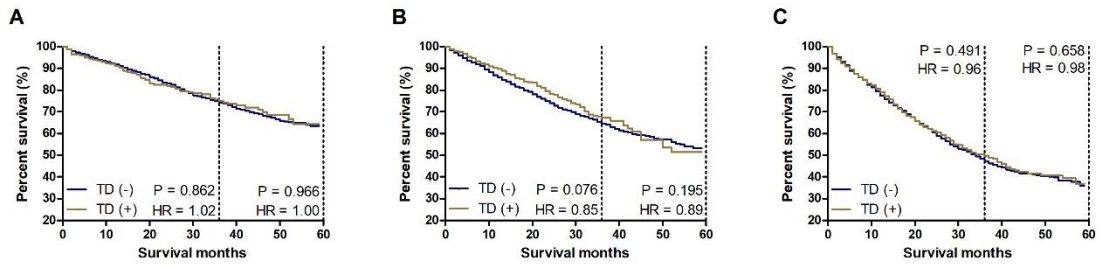

**Supplementary Figure 1.** Survival comparisons between TD (+) and TD (-) patients with the same number of mLNs. The number of mLNs is equal to the sum of the number of real mLNs and triple the number of TDs. **(A)** Survival comparison between TD (+) and TD (-) patients with 2-3 mLNs. **(B)** Survival comparison between TD (+) and TD (-) patients with 4-6 mLNs. **(C)** Survival comparison between TD (+) and TD (-) patients with  $\geq 7$  mLNs.

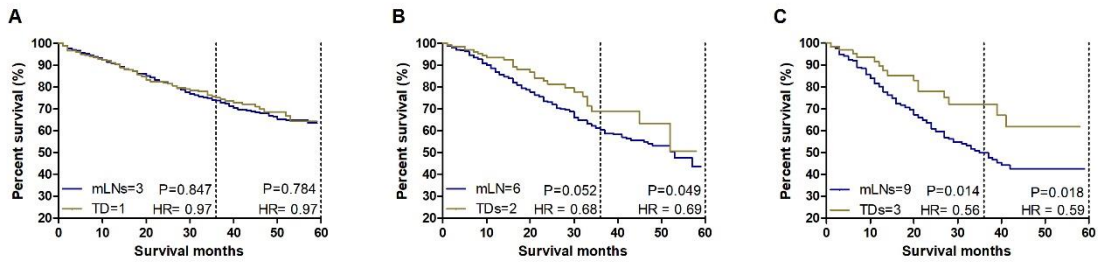

**Supplementary Figure 2.** Validating the prognostic value of TDs. **(A)** Survival comparison between patients with only 1 TD and patients with only 3 mLNs. **(B)** Survival comparison between patients with only 2 TDs and patients with only 6 mLNs. **(C)** Survival comparison between patients with only 3 TDs and patients with only 9 mLNs.

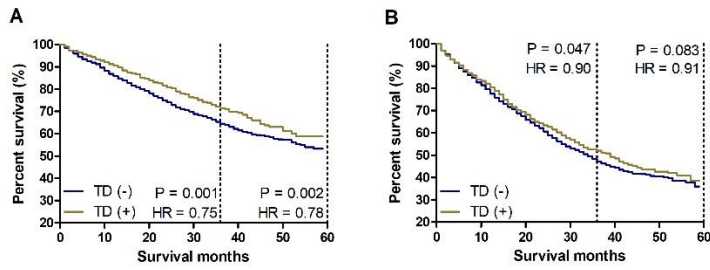

**Supplementary Figure 3.** Survival comparisons between TD (+) and TD (-) patients with the same number of mLNs. The number of mLNs is equal to the sum of the number of real mLNs and four times the number of TDs. **(A)** Survival comparison between TD (+) and TD (-) patients with 4-6 mLNs. **(B)** Survival comparison between TD (+) and TD (-) patients with  $\geq 7$  mLNs.

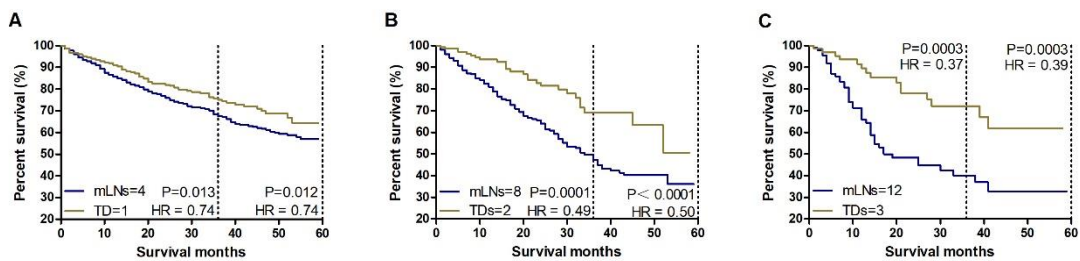

**Supplementary Figure 4.** Validating the prognostic value of TDs. **(A)** Survival comparison between patients with only 1 TD and patients with only 4 mLNs. **(B)** Survival comparison between patients with only 2 TDs and patients with only 8 mLNs. **(C)** Survival comparison between patients with only 3 TDs and patients with only 12 mLNs.

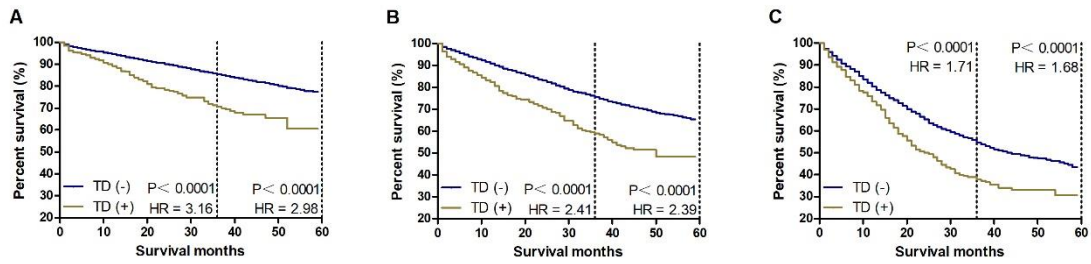

**Supplementary Figure 5.** Survival comparisons between TD (+) and TD (-) patients with colon cancer. **(A)** Survival comparison between TD (+) and TD (-) in colon cancer patients without mLNs. **(B)** Survival comparison between TD (+) and TD (-) in colon cancer patients with 1-3 mLNs. **(C)** Survival comparison between TD (+) and TD (-) in colon cancer patients with  $\geq 4$  mLNs.

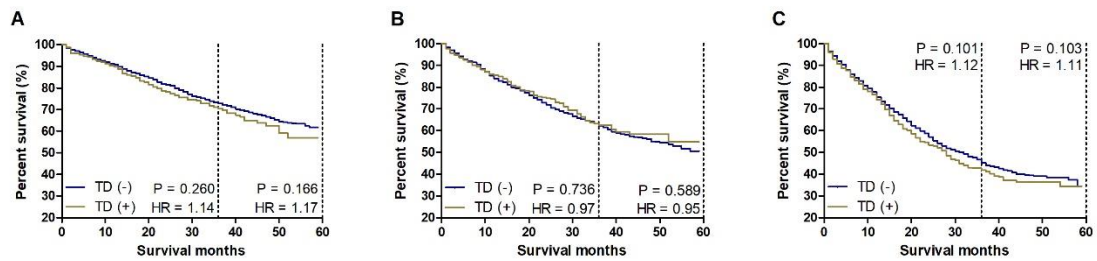

**Supplementary Figure 6.** Survival comparisons between TD (+) and TD (-) in colon cancer patients with the same number of mLNs. The number of mLNs is equal to the sum of the number of real mLNs and double the number of TDs. **(A)** Survival comparison between TD (+) and TD (-) in colon cancer patients with 2-3 mLNs. **(B)** Survival comparison between TD (+) and TD (-) in colon cancer patients with 4-6 mLNs. **(C)** Survival comparison between TD (+) and TD (-) in colon cancer patients with  $\geq 7$  mLNs.

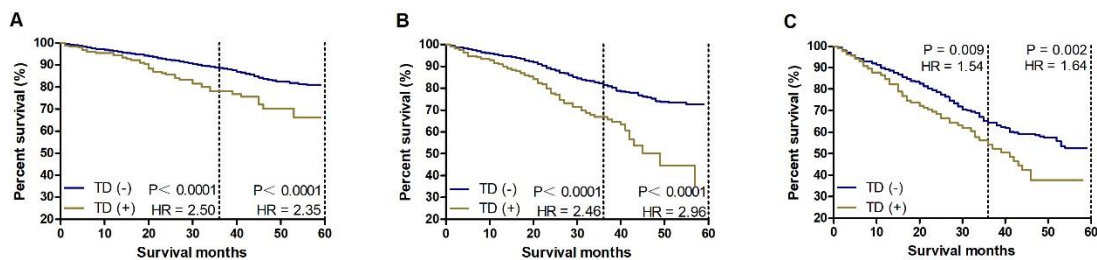

**Supplementary Figure 7.** Survival comparisons between TD (+) and TD (-) patients with rectal cancer. **(A)** Survival comparison between TD (+) and TD (-) in rectal cancer patients without mLNs. **(B)** Survival comparison between TD (+) and TD (-) in rectal cancer patients with 1-3 mLNs. **(C)** Survival comparison between TD (+) and TD (-) in rectal cancer patients with  $\geq 4$  mLNs.

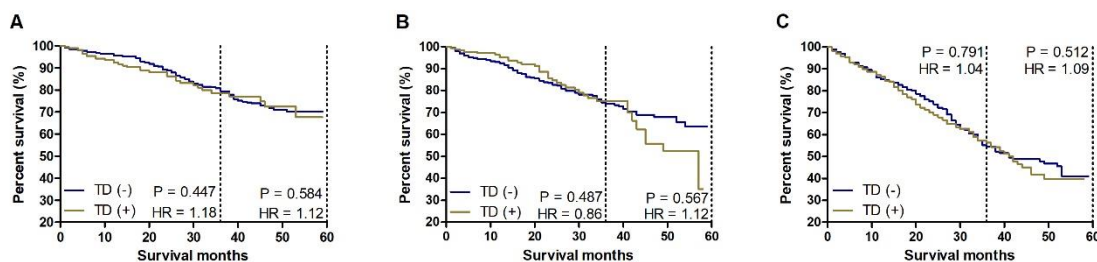

**Supplementary Figure 8.** Survival comparisons between TD (+) and TD (-) in rectal cancer patients with the same number of mLNs. The number of mLNs is equal to the sum of the number of real mLNs and double the number of TDs. **(A)** Survival comparison between TD (+) and TD (-) in rectal cancer patients with 2-3 mLNs. **(B)** Survival comparison between TD (+) and TD (-) in rectal cancer patients with 4-6 mLNs. **(C)** Survival comparison between TD (+) and TD (-) in rectal cancer patients with  $\geq 7$  mLNs.
